# Supplementary material
Source: publisher site journal article supplement (https://www.dovepress.com/get_supplementary_file.php?f=440340.docx)
Supplement: Supplementary file 1 [file get_supplementary_file.php]

Supplemental Table S1. Information on the clinical characteristics of the patient.

| No | gender | age | tumor site | Pathological type | tumor size | Differentiation | lymphatic metastasis | Distant metastasis | Staging | pathological stage |
| --- | --- | --- | --- | --- | --- | --- | --- | --- | --- | --- |
| 1 | Female | 81 | descending colon | adenocarcinoma | 4*3 | middle | 0/15 | not seen | II | pT3N0Mx |
| 2 | male | 42 | ascending colon | adenocarcinoma | 5.5*4.3 | mid lo | 7/24 | not seen | III | pT3N2Mx |
| 3 | Female | 77 | ascending colon | adenocarcinoma | 6*5.5 | middle | 0/18 | not seen | II | pT3N0Mx |
| 4 | male | 55 | sigmoid colon | adenocarcinoma | 4.5*3.5 | middle | 0/18 | not seen | Ⅱ | pT3N0Mx |
| 5 | male | 62 | sigmoid colon | adenocarcinoma | 6.5*4 | middle | 1/25 | not seen | Ⅲ | pT3N1Mx |
| 6 | Female | 67 | sigmoid colon | adenocarcinoma | 4*3 | middle | 8/21 | not seen | Ⅲ | pT4N2Mx |
| 7 | Female | 67 | ascending colon | adenocarcinoma | 4.3*3.7 | middle | 0/30 | not seen | Ⅱ | pT3N0Mx |
| 8 | Female | 84 | ascending colon | adenocarcinoma | 11*7 | low | 14/24 | not seen | Ⅲ | pT3N1Mx |
| 9 | male | 65 | sigmoid colon | adenocarcinoma | 3.9*4.2 | low | 0/18 | not seen | Ⅱ | pT3N0Mx |
| 10 | Female | 63 | ascending colon | adenocarcinoma | 5*4.7 | middle | 7/25 | not seen | Ⅲ | pT3N1Mx |
| 11 | male | 69 | ascending colon | adenocarcinoma | 4.1*3.5 | middle | 3/21 | not seen | Ⅲ | pT3N1Mx |
| 12 | male | 70 | descending colon | adenocarcinoma | 5.8*4 | middle | 6/18 | not seen | Ⅲ | pT3N1Mx |
| 13 | Female | 60 | sigmoid colon | adenocarcinoma | 6*3 | middle | 12/30 | not seen | Ⅲ | pT3N1Mx |
| 14 | Female | 65 | sigmoid colon | adenocarcinoma | 3.3*2.8 | mid lo | 0/18 | not seen | Ⅱ | pT3N0Mx |
| 15 | male | 71 | descending colon | adenocarcinoma | 6.1*5.5 | middle | 8/24 | not seen | Ⅲ | pT3N1Mx |

Supplemental Table S2. Node degree analysis of the common DEMis

| Rank | miRNA | Degree | Feature |
| --- | --- | --- | --- |
| 1 | hsa-miR-520e | 130 | up |
| 2 | hsa-miR-363-3p | 83 | down |
| 3 | hsa-miR-330-5p | 82 | up |
| 4 | hsa-miR-431-5p | 18 | up |
| 5 | hsa-miR-18a-3p | 1 | up |

Supplemental Table S3. The qRT-PCR primers of three key miRNA.

| miRNA name | F primer | R primer |  |
| --- | --- | --- | --- |
| U6(internal reference) | CTCGCTTCGGCAGCACA | AACGCTTCACGAATTTGCGT |  |
| hsa-miR-330-5p | GCGTCTCTGGGCCTGTGTC | AGTGCAGGGTCCGAGGTATT |  |
| hsa-miR-520e | GCGCTCAAGATGGAAGCAG | AGTGCAGGGTCCGAGGTATT |  |
| hsa-miR-363-3p | GCGAATTGCACGGTATCCA | AGTGCAGGGTCCGAGGTATT |  |

Supplementary Table S4. Univariate and multivariate analyses of the association of key miRNA expression and prognosis with clinicopathologic parameters in colon cancer patients.

| Characteristics | Total(N) | Univariate analysis | | | Multivariate analysis | | |
| --- | --- | --- | --- | --- | --- | --- | --- |
| HR (95% CI) | | *P* value | HR(95% CI) | | *P* value |
| Pathologic N stage | 441 |  | |  |  | |  |
| N0 | 256 | Reference | |  | Reference | |  |
| N1&N2 | 185 | 2.585 (1.730 - 3.863) | | < 0.001 | 0.601 (0.227 - 1.589) | | 0.305 |
| Pathologic M stage | 384 |  | |  |  | |  |
| M0 | 319 | Reference | |  | Reference | |  |
| M1 | 65 | 4.307 (2.745 - 6.759) | | < 0.001 | 2.669 (1.498 - 4.753) | | < 0.001 |
| Pathologic stage | 430 |  | |  |  | |  |
| Stage I&II | 240 | Reference | |  | Reference | |  |
| Stage III&IV | 190 | 2.942 (1.928 - 4.489) | | < 0.001 | 3.467 (1.119 - 10.739) | | 0.031 |
| Gender | 441 |  | |  |  | |  |
| Female | 211 | Reference | |  |  | |  |
| Male | 230 | 1.136 (0.767 - 1.683) | | 0.524 |  | |  |
| hsa-miR-363-3p | 406 |  |  | |  |  | |
| Low | 203 | Reference | |  | Reference | |  |
| High | 203 | 1.562 (1.030 - 2.368) | | 0.036 | 1.357 (0.858 - 2.146) | | 0.191 |
| hsa-miR-330-5p | 441 |  | |  |  | |  |
| Low | 220 | Reference | |  |  | |  |
| High | 221 | 0.874 (0.590 - 1.294) | | 0.500 |  | |  |
| hsa-miR-520e | 16 |  | |  |  | |  |
| Low | 8 | Reference | |  |  | |  |
| High | 8 | 0.348 (0.056 - 2.163) | | 0.257 |  | |  |
